# Supplementary material
Source: publisher figshare collection journal article supplement (https://frontiersin.figshare.com/ndownloader/files/34910772)
Supplement: Supplementary file 1 [file 34910772]

**Table S1.** Detailed description of the features included in the analysis of the action plans

| Adult plan | There is a dedicated action plan for patients aged 16 and above |
| --- | --- |
| Pediatric plan | There is a dedicated action plan for patients aged 6-16 |
| Adult and pediatric plan | There is a unique plan for adults and children |
| Information for parent/guardian | The plan provides a set of instructions that a parent or guardian (e.g., teacher) should follow in the event of an asthma attack |
| Emergency contact | The plan reports the phone numbers to contact in case of an asthma attack: alternative physician, asthma specialist, emergency room |
| Asthma education contact | The plan provides a phone number, an address and/or an e-mail of the asthma specialist responsible for the patient’s follow-up |
| Doctor information | The plan reports contacts of the patient’s family doctor/pediatrician |
| Photography | There is a photo ID of the patient |
| Authorization to administer medicines | A form authorizing the administration of drugs to by adults (other than the patients’ parents) caring for the pediatric patient at the moment of exacerbation is included |
| Last plan review | The date of the last time the plan was reviewed, checked, and adjusted according to the patient’s asthma severity, control, age, and weight is reported |
| Focus on triggers | The plan has a section describing the different triggers to be wary of to avoid the occurrence of exacerbations |
| Focus on exercise | The plan has a section describing how to behave when practicing sport/physical exercise and when/which medications to take if needed |
| Peak flow | The plan uses peak expiratory flow measurement to monitor asthma control |
| Additional tailored clinical information | The plan has a dedicated space to allow the inclusion of additional personalized information specific to the patient, not included in the pre-compiled sections |
| Severity classification | The plan present separate severity levels dictated by sign, symptoms and/or PEF measurement |
| List of asthma medications | The plan reports the list of specific asthma medications used by the patient |
| Colors of asthma medications | The plan reports the colors of specific asthma medications used by the patient |
| Comorbidities/other treatments | The plan mentions conditions other than asthma that can interfere with asthma management or conditions to be wary of while caring for the patient experiencing an asthma attack |
| Management of asthma attacks | The plan provides practical instructions on how to behave in the event of an asthma exacerbation (other than drug administration) |
| Reference to anaphylaxis and its management | The plan provides instructions on how to differentiate asthma attacks from anaphylactic reactions and how to address a suspected anaphylactic reaction |
| Information on asthma first-aid | There is a section explaining the primary care in case of an asthma attack |
| Information on asthma medication functioning | The plan describes the mechanism of action of medications and their different purposes and effects |
| Information on how to administer therapy | The plan describes the methods used to administer (inhaler) therapy in the most effective way |
| Information on recovery and follow-up | The plan describes the steps to take after the exacerbation has been managed and asthma control has been re-established |
| Mentions OCS use | The plans describe when to use oral corticosteroids and the dosage to take |
| Precompiled instructions/steps description | Instructions on how to recognize a worsening control and how to escalate therapy are included |
| Spacer mentioned | The plan encourages the use of a spacer when taking medications via an inhaler |

*Abbreviations used in the table.* PEF: peak expiratory flow; OCS: oral corticosteroids
